# Supplementary material
Source: Springer Nature journal article supplement (https://www.springermedizin.de/resource/supplementary/13014_2010_233_MOESM2_ESM.pdf/9633232)

**A)**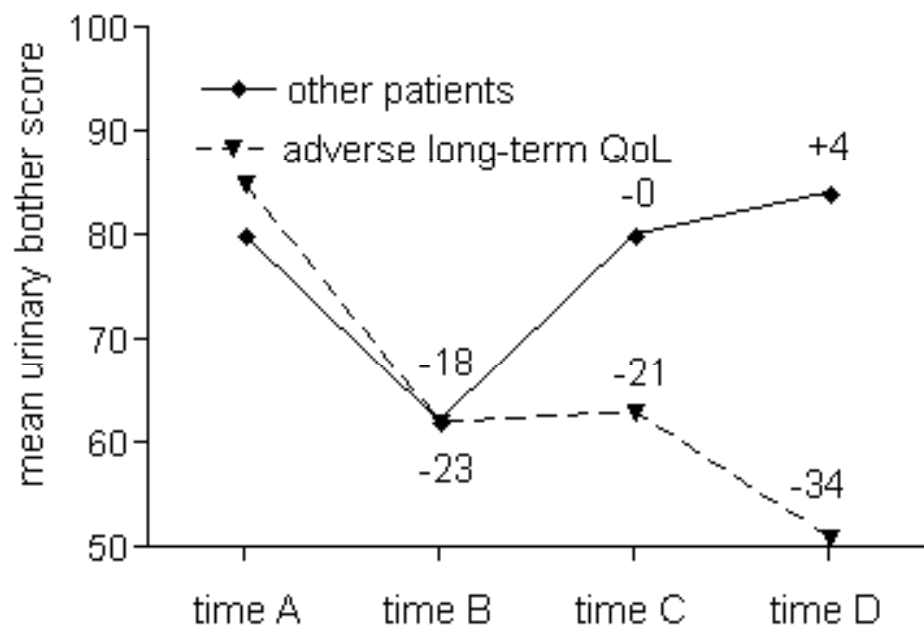**B)**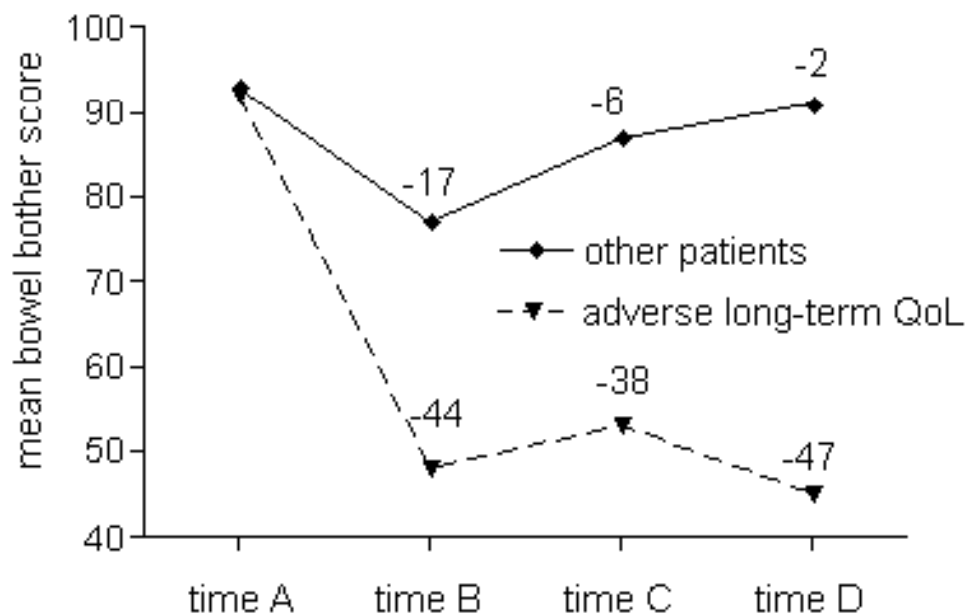

Supplement: MOESM2 [file 9633232]
